# Supplementary material for: PRMT5 regulates IRES-dependent translation via methylation of hnRNP A1
Source: PubMed Central journal article supplement — Nucleic Acids Res. 2017 Jan 23;45(8):4359–69. doi: 10.1093/nar/gkw1367 (PMC5416833; doi:10.1093/nar/gkw1367), 2017-01-23
Supplement: gkw1367_Supp.pdf [file gkw1367_Supp.pdf]

## PRMT5 regulates IRES-dependent translation via methylation of hnRNP A1

Guozhen Gao<sup>1</sup>, Surbhi Dhar<sup>1</sup>, Mark T Bedford<sup>1\*</sup>

1 Department of Epigenetics and Molecular Carcinogenesis, University of Texas MD Anderson Cancer Center, Smithville, TX 78957

\* To whom correspondence should be addressed. Tel: 512-237-9539; Fax: 512-237-2475; E-mail: [mtbedford@mdanderson.org](mailto:mtbedford@mdanderson.org).

### Experimental Procedures

**GST Pull-down Assay** – GST or GST-tagged Tudor domain proteins were expressed in *E. coli* strain BL21 by induction of IPTG for 4 hours at 30°C. Total bacteria were solicited and the lysate was incubated with Glutathione Sepharose 4B (GE Healthcare) at 4°C overnight. The sepharose bound proteins were washed with PBS for 3 times and eluted with 25mM reduced glutathione. PRMT5<sup>flox/flox</sup> MEFs were lysed with mild buffer and incubated with the recombinant GST or GST-SMN Tudor domain at 4°C overnight. Then sepharose were added and incubated for 1 hour. The beads were then pelleted and washed with PBS for 3 times and the bound proteins were eluted with SDS loading buffer and subjected to Western blotting for the detection of indicated proteins.

**Antibodies** – PRMT1 antibody (a gift from Dr. Stephane Richard), pan-ADMA substrate antibody (collaboration with Cell Signaling Technologies), anti-LDH (Santa Cruz) and anti-Lamin A/C (Santa Cruz), LC3B, eIF2 $\alpha$  and phosphorylated eIF2 $\alpha$  (S51) antibodies (from Cell Signaling Technologies).

**Immunofluorescence Staining for hnRNP A1** – PRMT5<sup>flox/flox</sup> MEFs were treated with or without 4-hydroxytamoxifen for 7 days and plated onto coverslips and cultured for 24 hours. Cells were washed, fixed with 4% paraformaldehyde for 10 min at room temperature, permeabilized with PBS containing 0.2% Triton and 0.8% FBS and washed three times with PBS. The cells were blocked with PBS containing 1% FBS for 1 hour, and anti-hnRNP A1 antibody was added to the coverslips and incubated for 2 hours. The cells were stained with Alexa Fluor 647-conjugated anti-mouse antibody followed by staining with 0.25 $\mu$ g/ml DAPI.

Primers used for qPCR:

Primers for both mouse and human:

PRMT5: TCAAAGCAGCCATTCTCCCCAC (For.) and TGGTTGGTGCCTGTGATGATGAAC (Rev.)

MEP50: AGACACTTATTGTCAGCAAG (For.) and AATCTGTGATGCTGGCTTG (Rev.)

Primers for human only:

CCND1: CTCCTGTGCTGCGAAGTGG (For.) and CTTCTGTTCCCTCGCAGACCTCC (Rev.)

MYC: AGCGACTCTGAGGAGGAACA (For.) and CCCTCTTGGCAGCAGGATAG (Rev.)

HIF1a: ATCACCTCTTCGTCGCTTC (For.) and ACTTATCTTTTTCTTGTCGTTTCGC (Rev.)

ESR1: ACAAGCGCCAGAGAGATGAT (For.) and AAGGTTGGCAGCTCTCATGT (Rev.)

GAPDH: AGCCACATCGCTCAGACAC (For.) and GCCCAATACGACCAAATCC (Rev.)

Primers for mouse only:

CCND1: CCAACAACCTCCTCTCCTGCT (For.) and GACTCCAGAAGGGCTTCAATC (Rev.)

MYC: TCTCCACTCACCAGCACAACACTACG (For.) and ATCTGCTTCAGGACCCT (Rev.)

HIF1a: GCGAGAACGAGAAGAAAAAGATGA (For.) and GCCGTCATCTGTAGCACCA (Rev.)

ESR1: CTTCAGTGCCAACAGCCT (For.) and GACAGTCTCTCTCGGCCAT (Rev.)

GAPDH: CCCACTAACATCAAATGGGG (For.) and CCTTCCACAATGCCAAAGTT (Rev.)

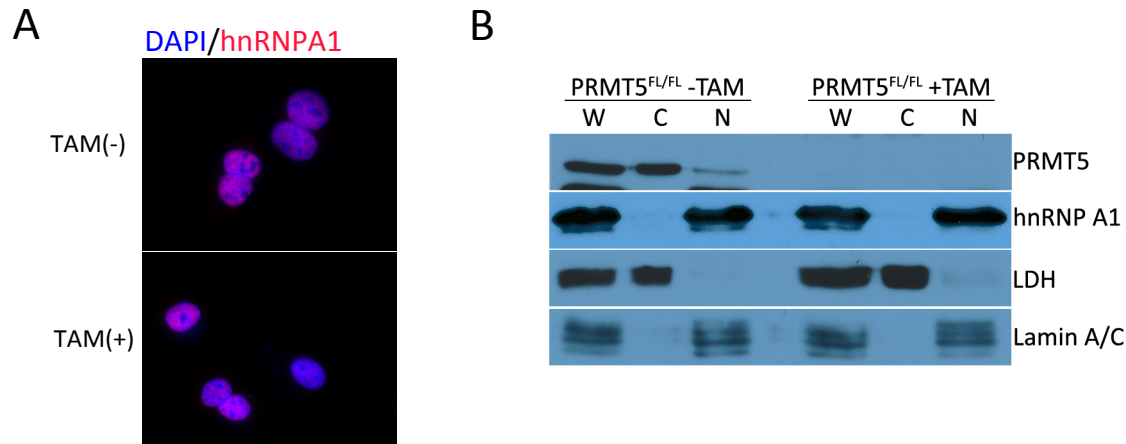

**Figure S1: Methylation of hnRNP A1 by PRMT5 does not affect its subcellular localization.** PRMT5<sup>flx/flx</sup> MEFs were treated with or without 2  $\mu$ M tamoxifen for 8 days. **A.** Then half of the cells were fixed and stained with anti-hnRNP A1 antibody followed by Alexa Fluor 647 conjugated anti-mouse secondary antibody (red), and DAPI staining (blue). **B.** The other half were lysed with cytoplasmic/nuclear fractionation kit, and subjected to Western blotting for hnRNP A1. PRMT5 was also detected to control the knockout efficiency; LDH and Lamin A/C were for controlling fractionation.

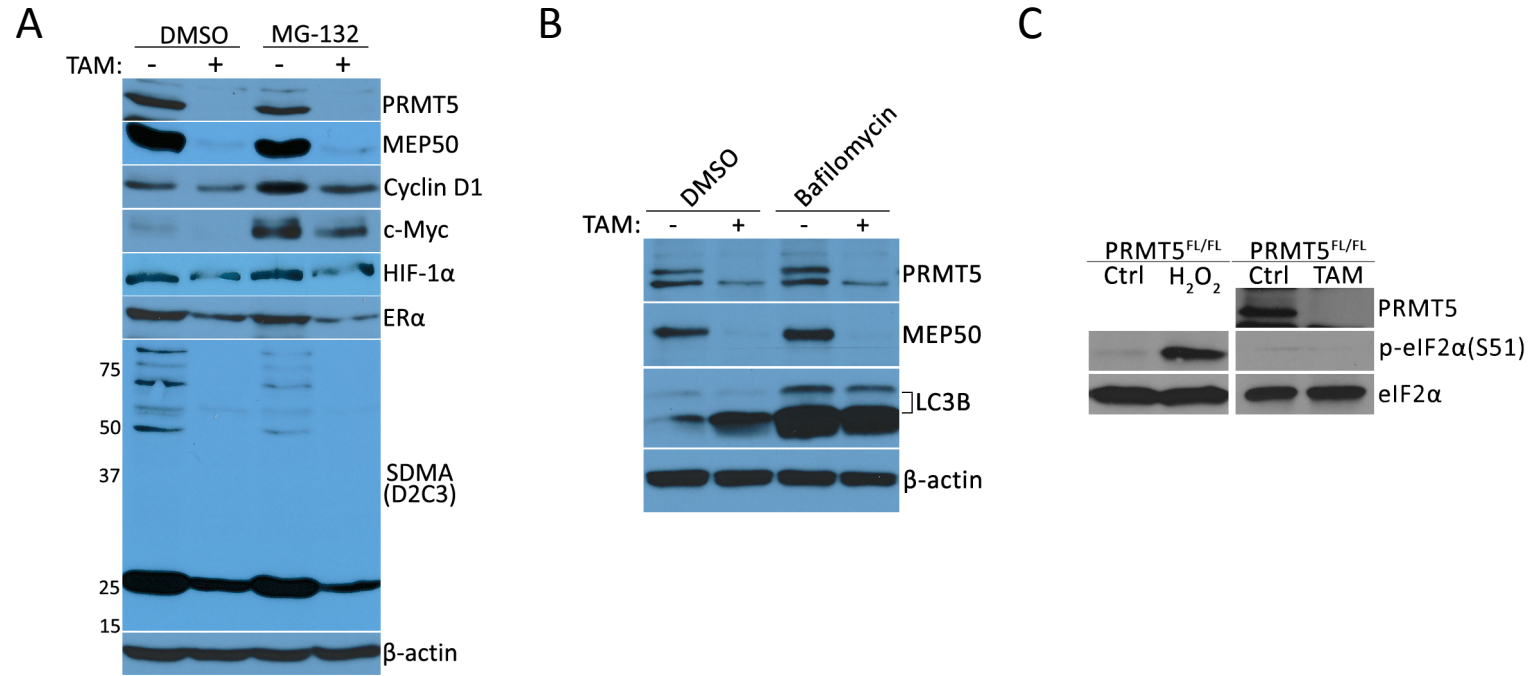

**Figure S2: Proteins down-regulated by PRMT5 could not be rescued by proteasome inhibitor.** **A.** PRMT5<sup>fllox/fllox</sup> MEFs were treated with or without 2  $\mu$ M tamoxifen for 10 days, and then with DMSO or 20  $\mu$ M of the proteasome inhibitor MG-132 for 4 hours. The protein levels of the indicated proteins were detected by Western blotting. **B.** PRMT5<sup>fllox/fllox</sup> MEFs were treated with or without 2  $\mu$ M tamoxifen for 8 days, and then with DMSO or 200 nM of the lysosome inhibitor bafilomycin for 24 hours. The protein levels of the indicated proteins were detected by Western blotting. **C.** PRMT5<sup>fllox/fllox</sup> MEFs were either treated with 1 mM H<sub>2</sub>O<sub>2</sub> for 2 hours or 2  $\mu$ M tamoxifen for 8 days. The levels of total eIF2 $\alpha$  and phosphorylated eIF2 $\alpha$  were tested by Western blotting.

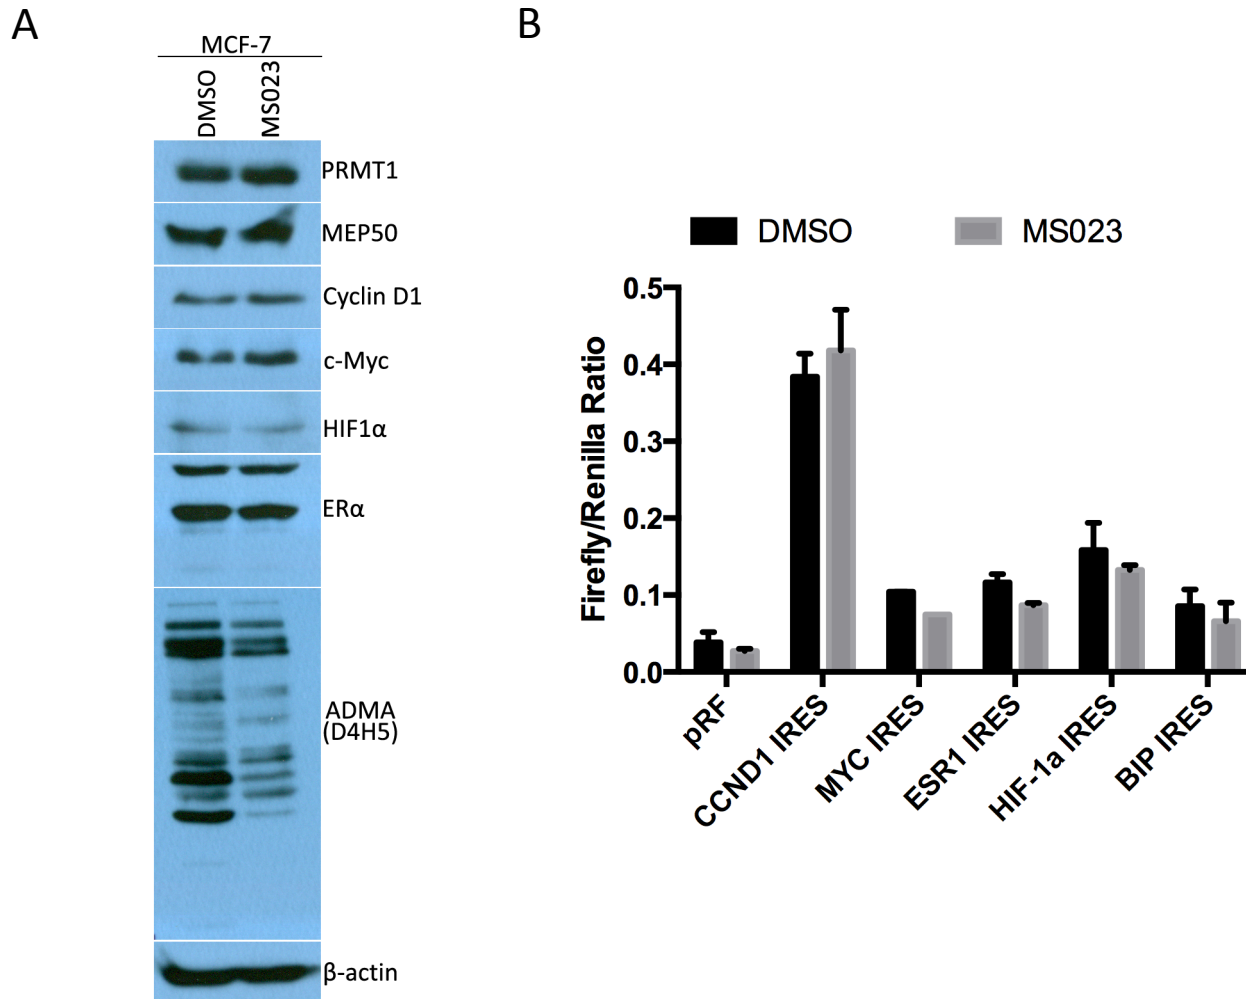

**Figure S3: Inhibition of PRMT1 activity does not affect the IRES-dependent translation of indicated genes.** **A.** MCF-7 cells were treated with 1  $\mu$ M PRMT1 inhibitor (MS023) for 4 days. The protein levels of the indicated proteins were detected by Western blotting. **B.** MCF-7 cells were treated with 1  $\mu$ M PRMT1 inhibitor for 4 days. On day 3, cells were transfected with indicated IRES-dependent reporter constructs. At the end of day 4, cells were harvested for luciferase activity assay. The ratios of firefly over renilla luciferase activity were calculated.

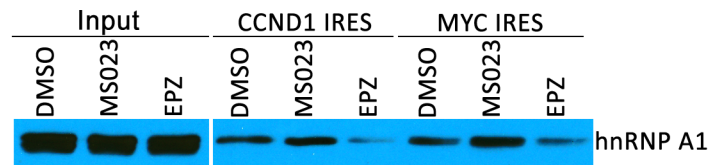

**Figure S4: Inhibition of PRMT1 activity enhanced the binding between hnRNP A1 and its target IRESes.** PRMT5<sup>flax/flax</sup> MEFs were treated with 1  $\mu$ M PRMT1 inhibitor or 5  $\mu$ M PRMT5 inhibitor for 4 days. RNA pulldown was performed with biotin-labeled CCND1 or MYC IRES. The protein levels of hnRNP A1 bound to IRESes were detected by Western blotting.
